# Supplementary material for: Development of Chitosan Particles Loaded with siRNA for Cystatin C to Control Intracellular Drug-Resistant Mycobacterium tuberculosis
Source: MDPI journal article supplement (doi:10.3390/antibiotics12040729), 2023-04-08
Supplement: s1 [file s1]

## Supplementary Material

### Development of chitosan particles loaded with siRNA for cystatin C to control intracellular drug-resistant *Mycobacterium tuberculosis*

David Pires <sup>1,2,†</sup>, Manoj Mandal <sup>1,†</sup>, Ana I. Matos <sup>3</sup>, Carina Peres <sup>3</sup>, Maria João Catalão <sup>1</sup>, José Miguel Azevedo-Pereira <sup>1</sup>, Ronit Satchi-Fainaro, Helena F. Florindo <sup>3</sup> and Elsa Anes <sup>1,\*</sup>

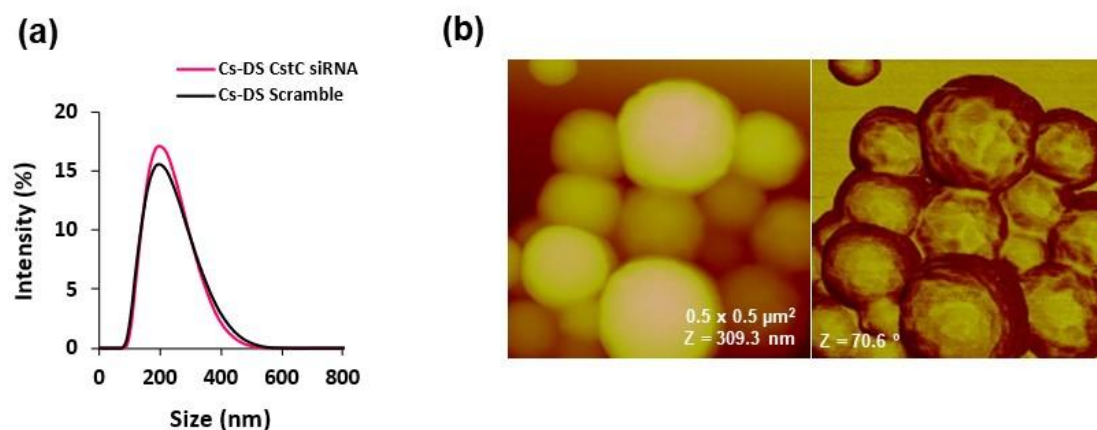

**Figure S1.** Physicochemical and morphological properties of Cs-DS. Dynamic light scattering analysis (a) and atomic force microscopy images (topography – left; phase – right) (b) showed a uniform-size polydispersity for slightly rough spherical particles.
